# Supplementary material for: LaMoBO6:Tb3+,Eu3+/Sm3+,Bi3+ yellow phosphors with exceptionally high quantum yields that can be excited by blue light
Source: Royal Society of Chemistry journal article supplement (doi:10.1039/d1tc00254f), 2021-01-01
Supplement: d1tc00254f1.pdf [file d1tc00254f1.pdf]

**supplementary information:**

**LaMoBO<sub>6</sub>: Tb<sup>3+</sup>, Eu<sup>3+</sup>/ Sm<sup>3+</sup>, Bi<sup>3+</sup> yellow phosphor with exceptionally  
high quantum yield that can be excited by blue light**

Shuai Yang,<sup>a,b#</sup> Bin Jiang,<sup>a#</sup> Jiahao Wu,<sup>a</sup> Chungang Duan,<sup>a,c</sup> Yongkui Shan,<sup>b</sup> Qingbiao  
Zhao<sup>a\*</sup>

<sup>a</sup> Key Laboratory of Polar Materials and Devices (MOE), Department of Electronic  
Science, East China Normal University, Shanghai, 200241 China

<sup>b</sup> School of Chemistry and Molecular Engineering, East China Normal University,  
Shanghai, 200241 China

<sup>c</sup> Collaborative Innovation Center of Extreme Optics, Shanxi University, Shanxi  
030006, China

# These authors contributed equally

To whom correspondence should be addressed:

Dr. Qingbiao Zhao

Email: qbzhao@ee.ecnu.edu.cn

Tel: +86-021-33503200

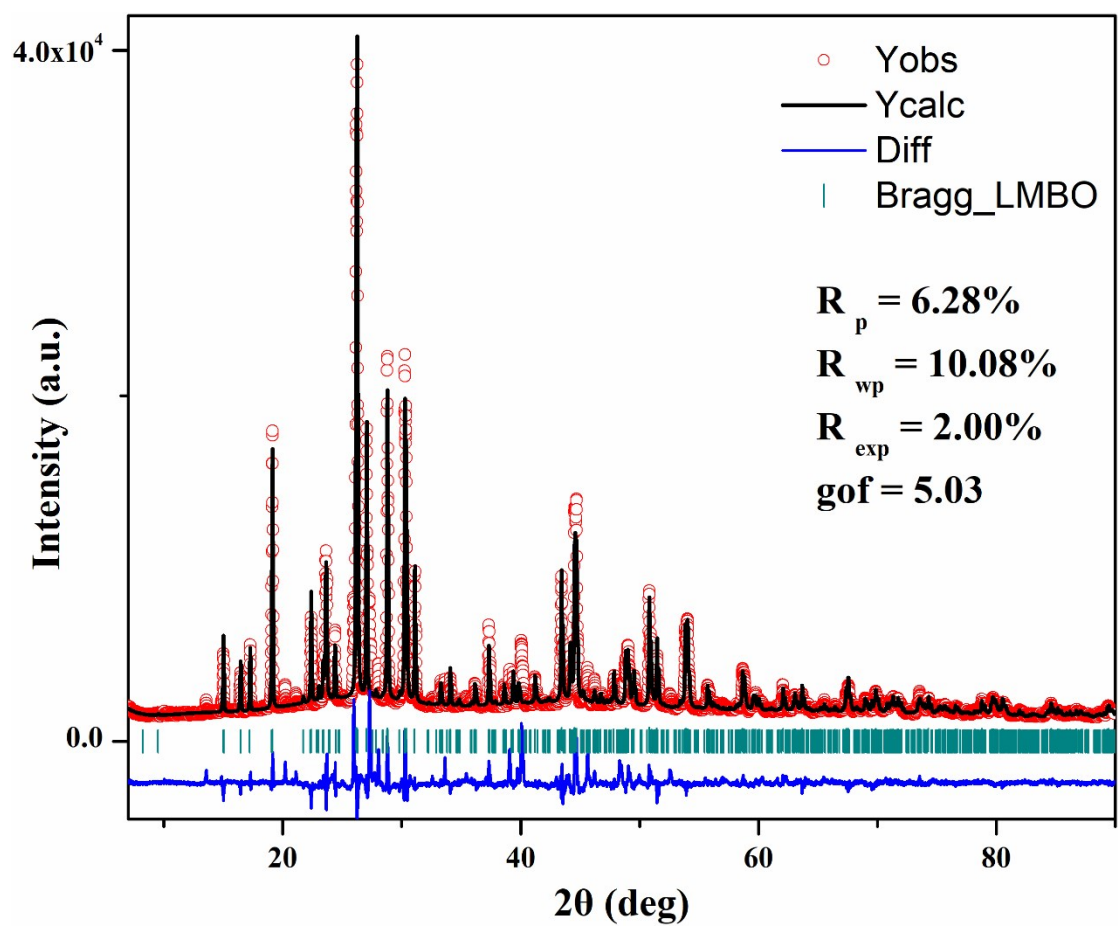

**Figure S1.** The XRD Rietveld refinement of  $\text{LaMoBO}_6$  (LMBO) host lattice.

**Table S1.** The Rietveld refinement parameters and unit cell parameters of LMBO host lattice and LMBO: 0.1Tb<sup>3+</sup> phosphor

| Parameters          | LMBO host lattice       | LMBO: 0.1Tb <sup>3+</sup> phosphor |
|---------------------|-------------------------|------------------------------------|
| Space group         | <i>P2<sub>1</sub>/c</i> | <i>P2<sub>1</sub>/c</i>            |
| a (Å)               | 10.29549                | 10.25266                           |
| b (Å)               | 4.16388                 | 4.15637                            |
| c (Å)               | 23.84481                | 23.72538                           |
| $\alpha$            | 90°                     | 90°                                |
| $\beta$             | 115.38073°              | 115.16018°                         |
| $\gamma$            | 90°                     | 90°                                |
| V (Å <sup>3</sup> ) | 923.5440                | 915.1051                           |
| R <sub>p</sub>      | 6.28%                   | 5.86%                              |
| R <sub>wp</sub>     | 10.08%                  | 9.68%                              |
| R <sub>exp</sub>    | 2.00%                   | 1.98%                              |
| R <sub>bragg</sub>  | 3.82%                   | 3.28%                              |
| gof                 | 5.03                    | 4.89                               |

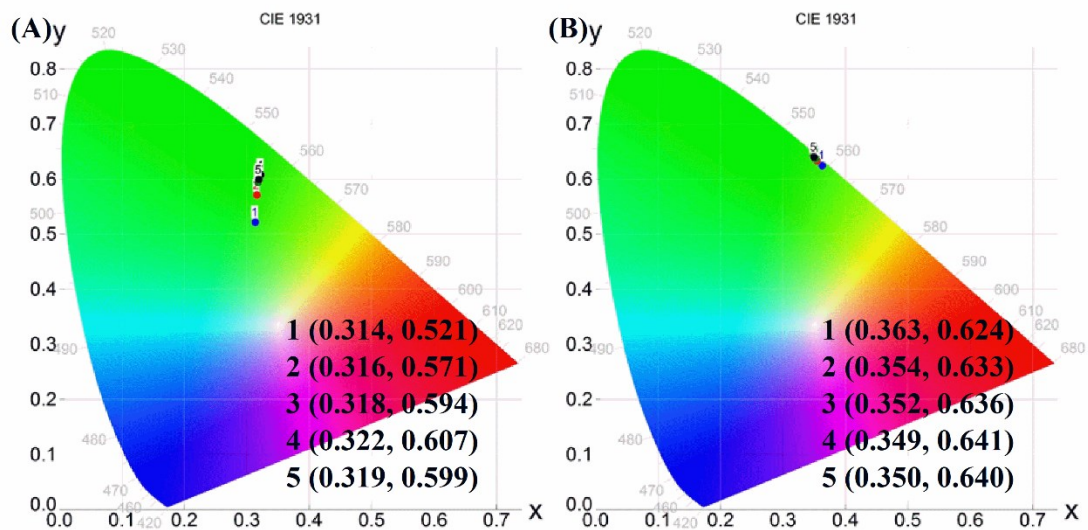

**Figure S2. (A & B)** The color coordinate diagrams of LMBO: xTb<sup>3+</sup> green phosphors under the excitation of 378 nm and 487 nm.

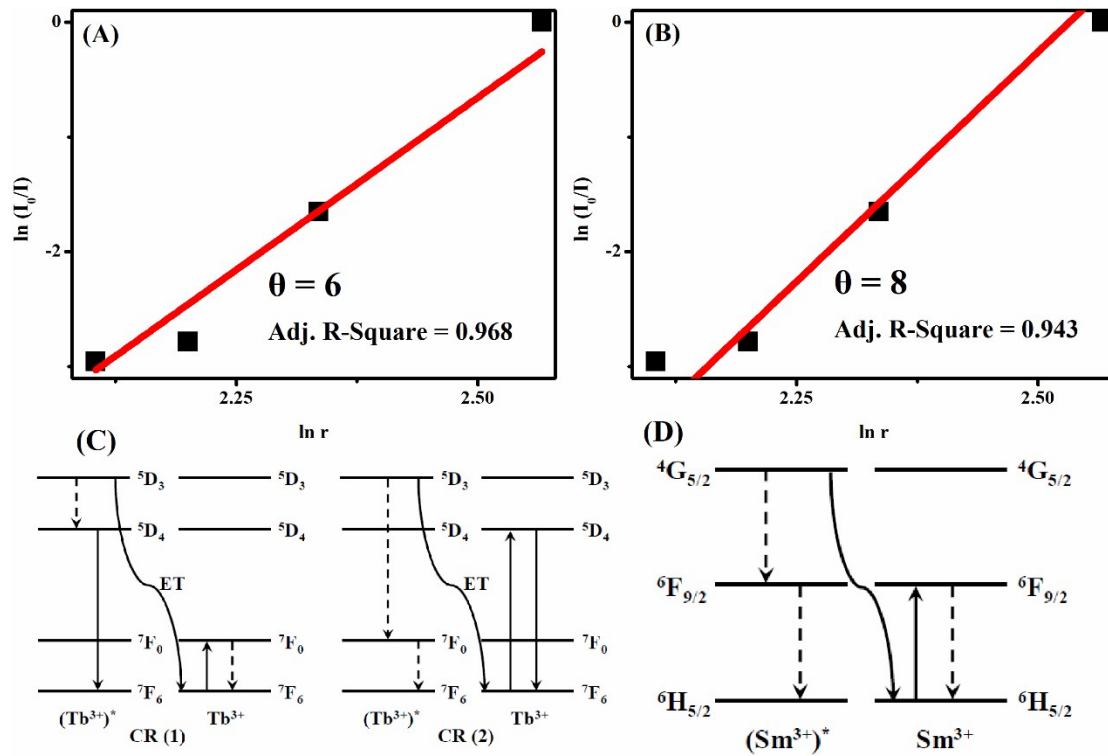

**Figure S3.** (A & B) The fitting of  $\ln(I_0/I)$  against  $\ln r$  for LMBO:  $x\text{Tb}^{3+}$  green phosphors with the value of  $\theta$  being 6 and 8, respectively; (C & D) The schematic diagram for the cross-relaxation of  $\text{Tb}^{3+}$  and  $\text{Sm}^{3+}$ .

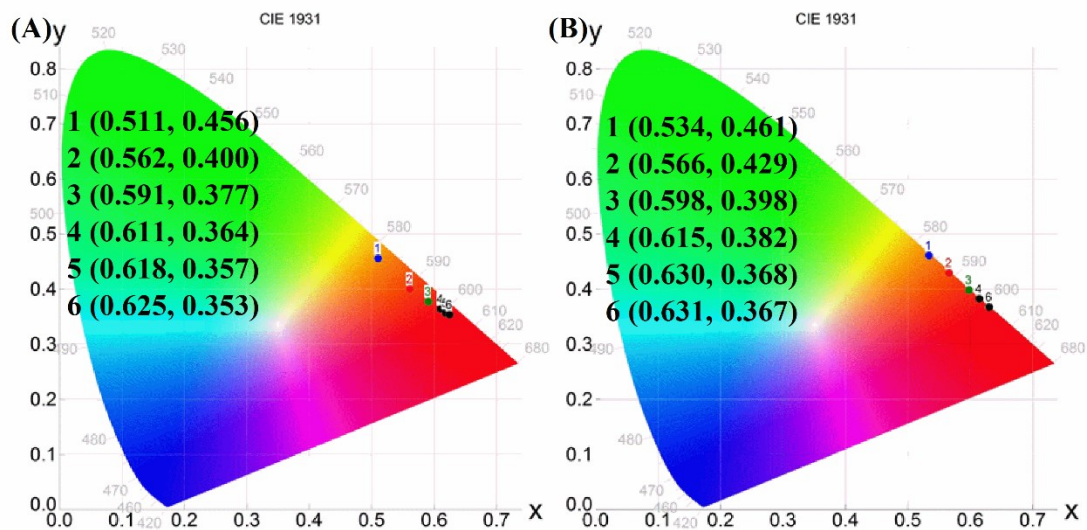

**Figure S4.** (A & B) The color coordinate diagram of LMBO: 0.04Tb<sup>3+</sup>, yEu<sup>3+</sup> yellow phosphors under the excitation of 378 nm and 487 nm.

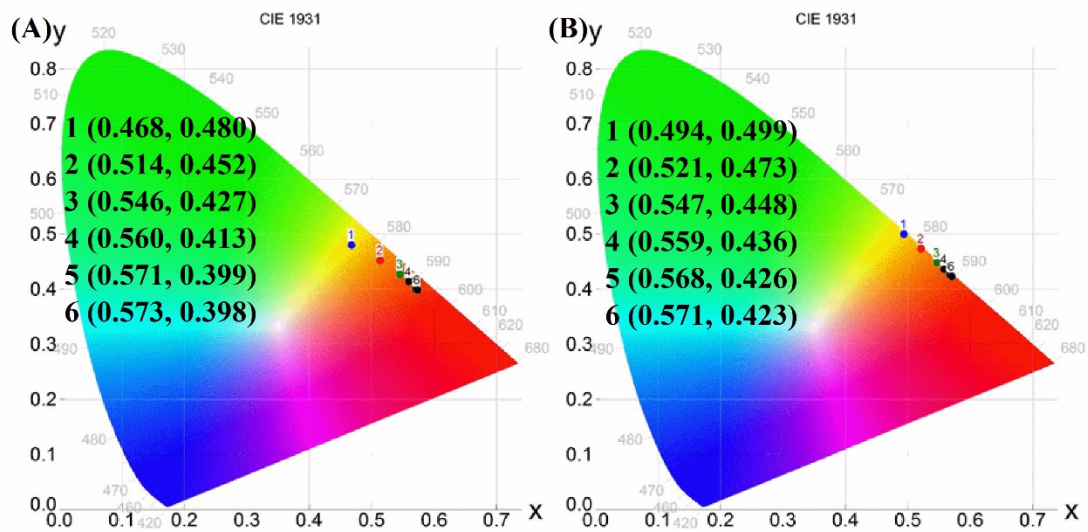

**Figure S5. (A & B)** The color coordinate diagram of LMBO: 0.04Tb<sup>3+</sup>, y'Sm<sup>3+</sup> yellow phosphors under the excitation of 378 nm and 487 nm.

**Table S2.** The quantum yields of the LMBO: 0.4Tb<sup>3+</sup> and LMBO: 0.4Tb<sup>3+</sup>, xEu<sup>3+</sup>/  
Sm<sup>3+</sup> phosphors.

| Doping ions and ratios                      | 378 nm | 487 nm     |
|---------------------------------------------|--------|------------|
| 0.4Tb <sup>3+</sup>                         | 8%     | <b>77%</b> |
| 0.4Tb <sup>3+</sup> , 0.005Eu <sup>3+</sup> | 24%    | <b>82%</b> |
| 0.4Tb <sup>3+</sup> , 0.01Eu <sup>3+</sup>  | 22%    | 58%        |
| 0.4Tb <sup>3+</sup> , 0.02Eu <sup>3+</sup>  | 29%    | 23%        |
| 0.4Tb <sup>3+</sup> , 0.03Eu <sup>3+</sup>  | 31%    | 33%        |
| 0.4Tb <sup>3+</sup> , 0.04Eu <sup>3+</sup>  | 58%    | 41%        |
| 0.4Tb <sup>3+</sup> , 0.05Eu <sup>3+</sup>  | 37%    | 28%        |
| 0.4Tb <sup>3+</sup> , 0.005Sm <sup>3+</sup> | 12%    | 56%        |
| 0.4Tb <sup>3+</sup> , 0.01Sm <sup>3+</sup>  | 19%    | 19%        |
| 0.4Tb <sup>3+</sup> , 0.02Sm <sup>3+</sup>  | 23%    | 17%        |
| 0.4Tb <sup>3+</sup> , 0.03Sm <sup>3+</sup>  | 19%    | 13%        |
| 0.4Tb <sup>3+</sup> , 0.04Sm <sup>3+</sup>  | 13%    | 10%        |
| 0.4Tb <sup>3+</sup> , 0.05Sm <sup>3+</sup>  | 14%    | 9%         |



**Table S3.** The quantum yields of the LMBO: 0.4Tb<sup>3+</sup>, zBi<sup>3+</sup> and LMBO: 0.4Tb<sup>3+</sup>, 0.005Eu<sup>3+</sup>/ Sm<sup>3+</sup>, zBi<sup>3+</sup> phosphors.

| Doping ions and ratios                                              | 378 nm | 487 nm     |
|---------------------------------------------------------------------|--------|------------|
| 0.4Tb <sup>3+</sup> , 0.0005Bi <sup>3+</sup>                        | 23%    | 57%        |
| 0.4Tb <sup>3+</sup> , 0.001Bi <sup>3+</sup>                         | 25%    | 70%        |
| 0.4Tb <sup>3+</sup> , 0.005Bi <sup>3+</sup>                         | 22%    | 60%        |
| 0.4Tb <sup>3+</sup> , 0.01Bi <sup>3+</sup>                          | 13%    | 46%        |
| 0.4Tb <sup>3+</sup> , 0.01Eu <sup>3+</sup> , 0.001Bi <sup>3+</sup>  | 27%    | 86%        |
| 0.4Tb <sup>3+</sup> , 0.005Eu <sup>3+</sup> , 0.005Bi <sup>3+</sup> | 24%    | 81%        |
| 0.4Tb <sup>3+</sup> , 0.005Eu <sup>3+</sup> , 0.01Bi <sup>3+</sup>  | 21%    | 88%        |
| 0.4Tb <sup>3+</sup> , 0.005Eu <sup>3+</sup> , 0.02Bi <sup>3+</sup>  | 14%    | <b>92%</b> |
| 0.4Tb <sup>3+</sup> , 0.005Eu <sup>3+</sup> , 0.03Bi <sup>3+</sup>  | 5%     | 78%        |
| 0.4Tb <sup>3+</sup> , 0.005Sm <sup>3+</sup> , 0.001Bi <sup>3+</sup> | 12%    | 68%        |
| 0.4Tb <sup>3+</sup> , 0.005Sm <sup>3+</sup> , 0.005Bi <sup>3+</sup> | 11%    | 46%        |
| 0.4Tb <sup>3+</sup> , 0.005Sm <sup>3+</sup> , 0.01Bi <sup>3+</sup>  | 9%     | 56%        |
| 0.4Tb <sup>3+</sup> , 0.005Sm <sup>3+</sup> , 0.02Bi <sup>3+</sup>  | 4%     | 53%        |
| 0.4Tb <sup>3+</sup> , 0.005Sm <sup>3+</sup> , 0.03Bi <sup>3+</sup>  | 9%     | 51%        |

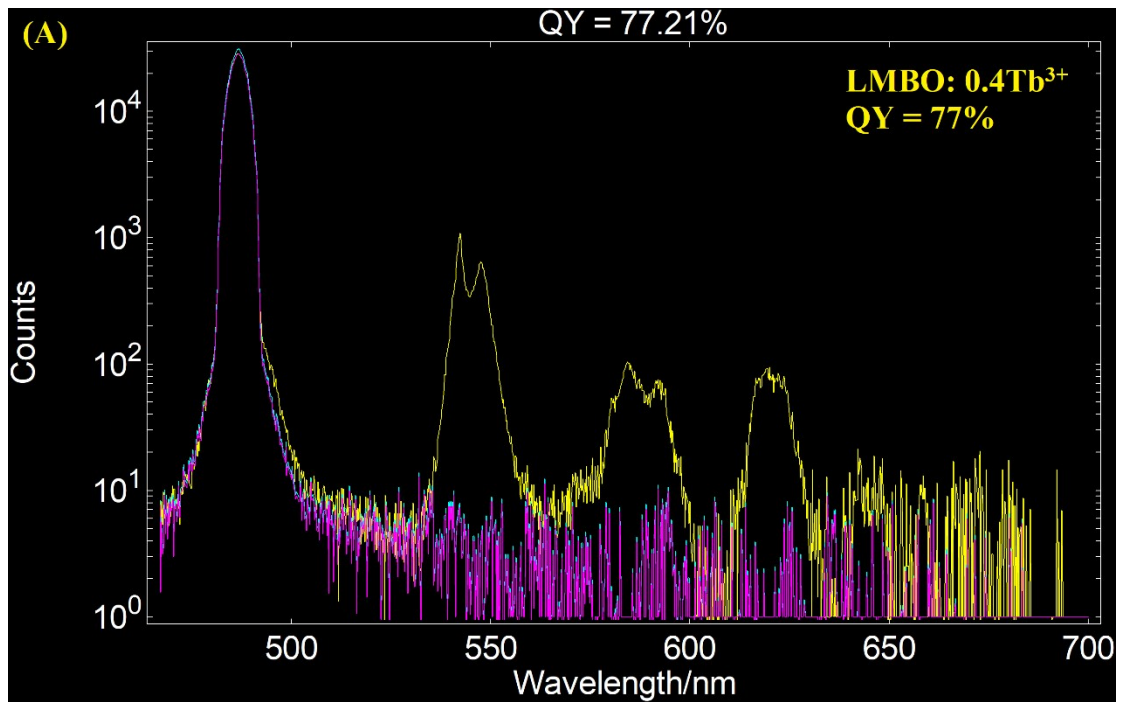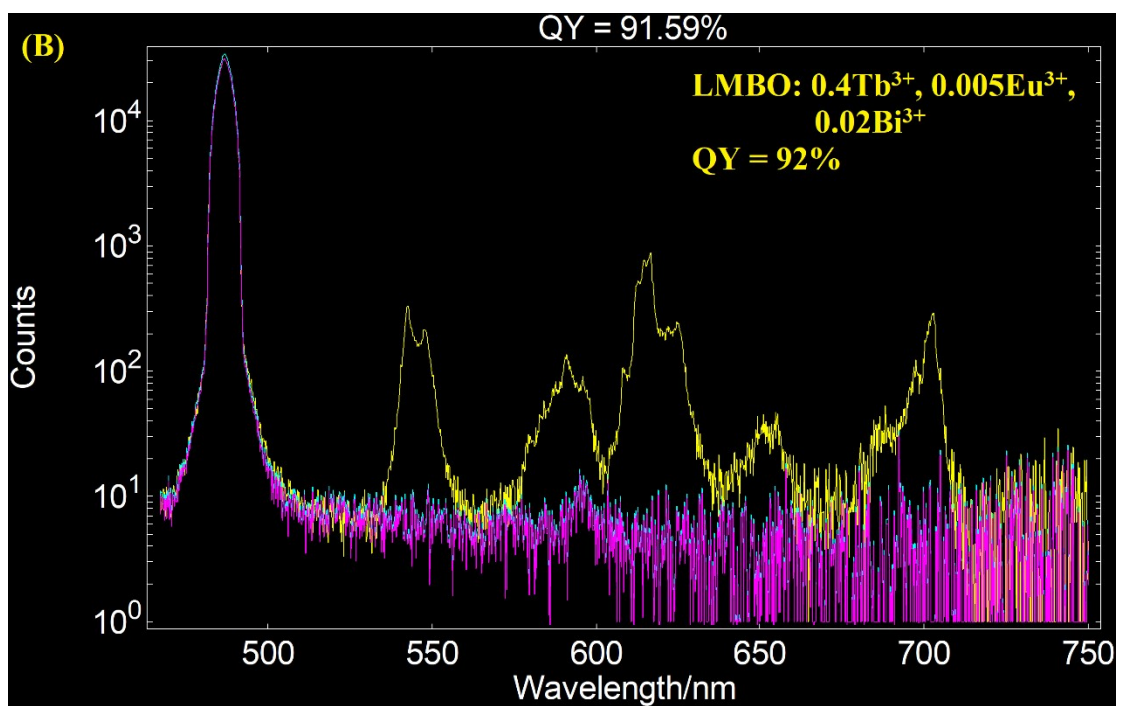

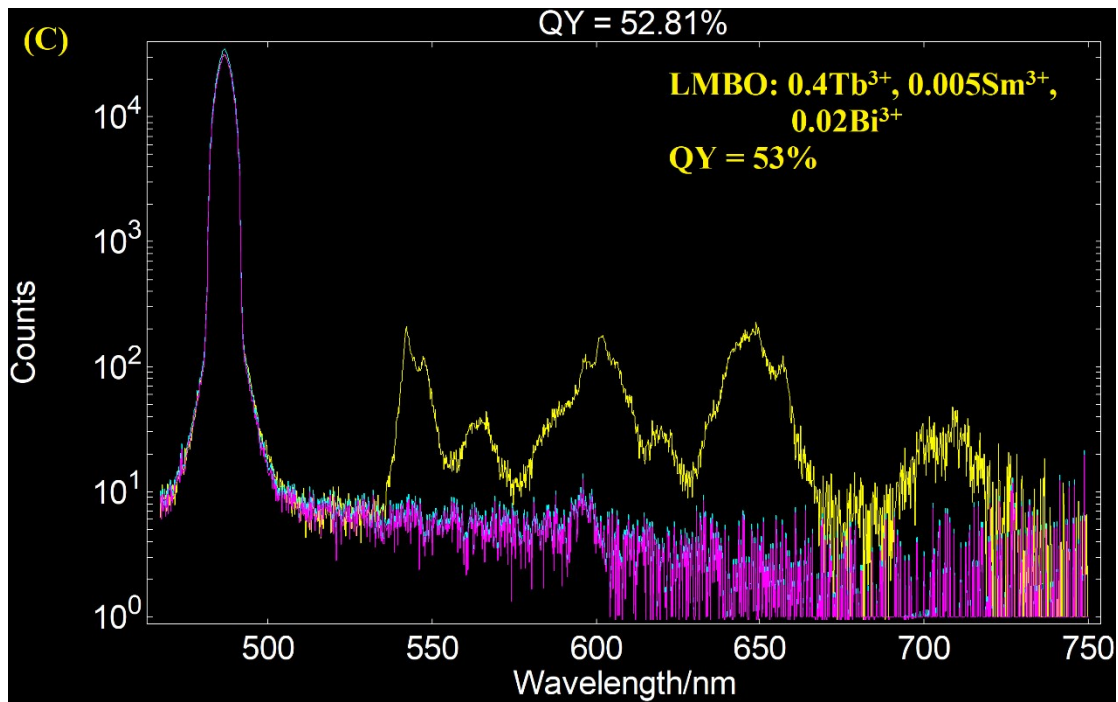

**Figure S6.** The quantum yield test charts of (A) LMBO: 0.4Tb<sup>3+</sup>, (B) LMBO: 0.4Tb<sup>3+</sup>, 0.005Eu<sup>3+</sup>, 0.02Bi<sup>3+</sup> and (C) LMBO: 0.4Tb<sup>3+</sup>, 0.005Sm<sup>3+</sup>, 0.02Bi<sup>3+</sup> phosphors.

The quantum yield was tested using an integrating sphere and calculated according to equation:

$$QY = \frac{P_c}{L_a - L_c}$$

where QY is the quantum yield,  $P_c$  is the count of emitted photons of the sample in the integrating sphere,  $L_a$  is the count of reflected photons of the excitation light in the integrating sphere with a blank background, and  $L_c$  is the count of reflected photons of the excitation light in the integrating sphere of the sample.

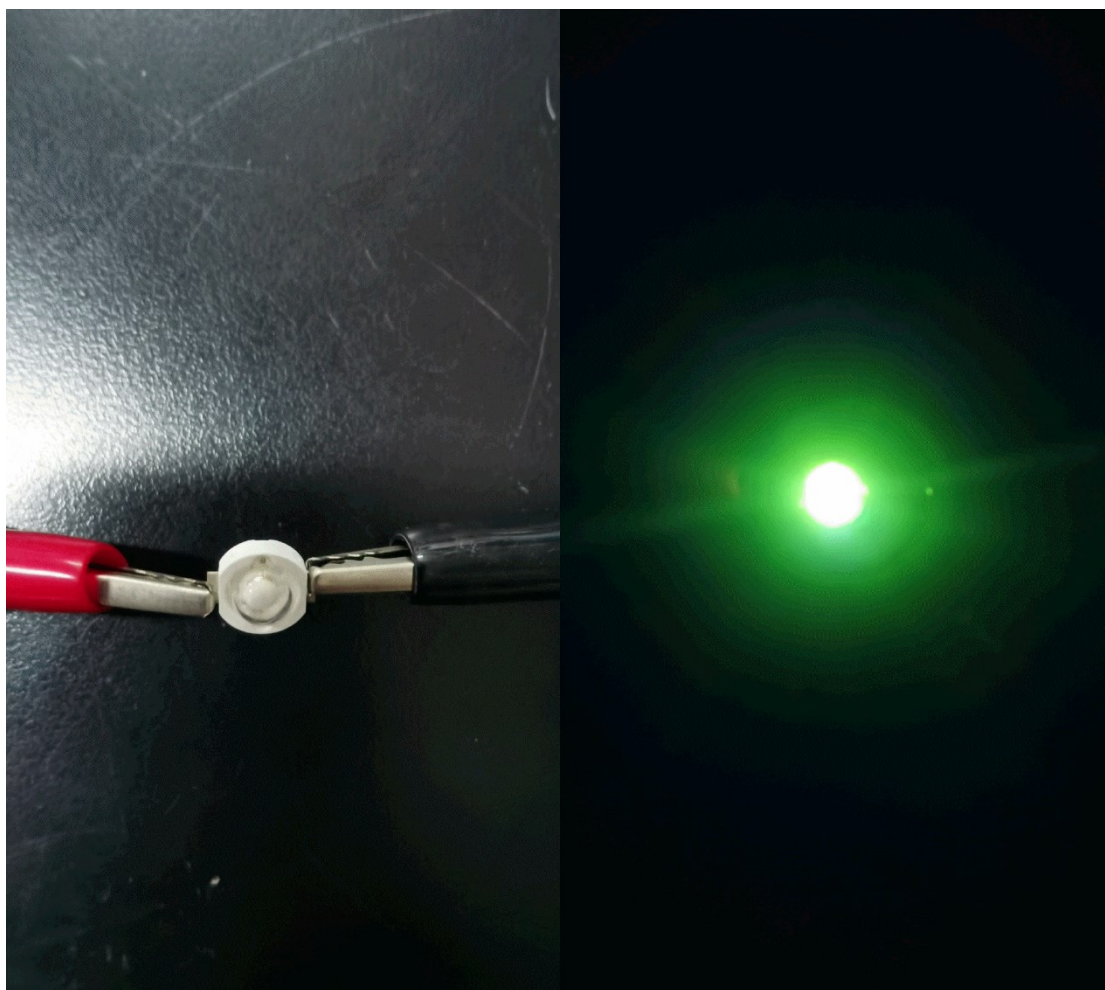

**Figure S7.** The photograph of green LED with 375~380 nm UV-LED and LMBO:  $0.4\text{Tb}^{3+}$  green phosphor combined.

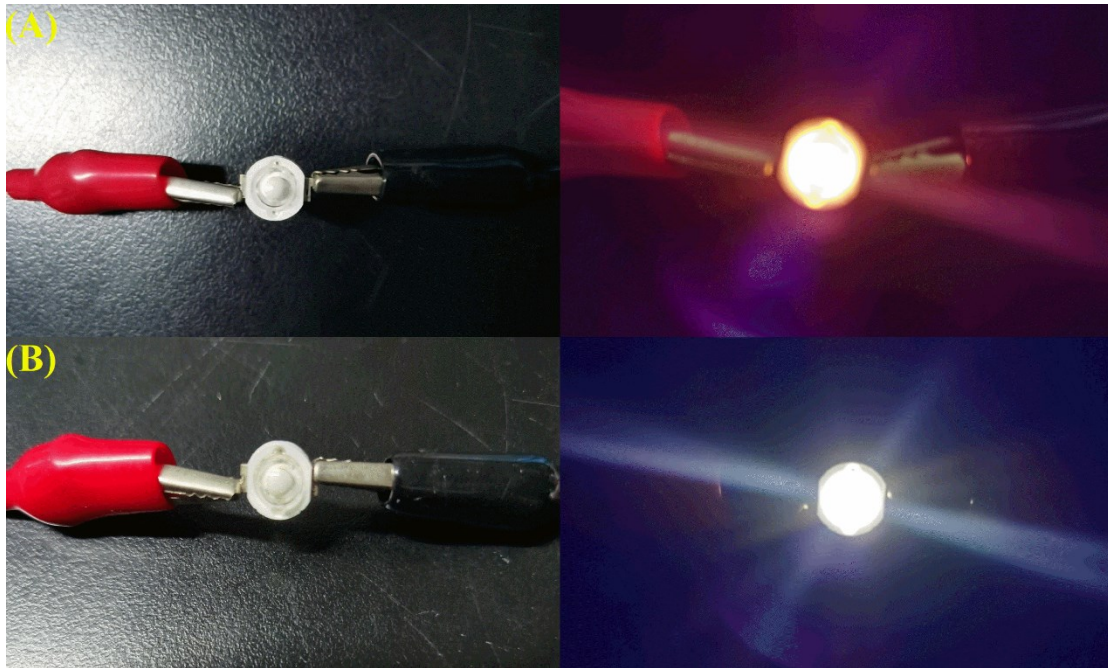

**Figure S8.** (A) The photograph of yellow LED with 375~380 nm UV-LED and LMBO:  $0.4\text{Tb}^{3+}$ ,  $0.005\text{Eu}^{3+}$  yellow phosphor combined; (B) The photograph of white LED with 375~380 nm UV-LED, LMBO:  $0.4\text{Tb}^{3+}$ ,  $0.005\text{Eu}^{3+}$  yellow phosphor and blue phosphor (BAM:  $\text{Eu}^{2+}$ ) combined.

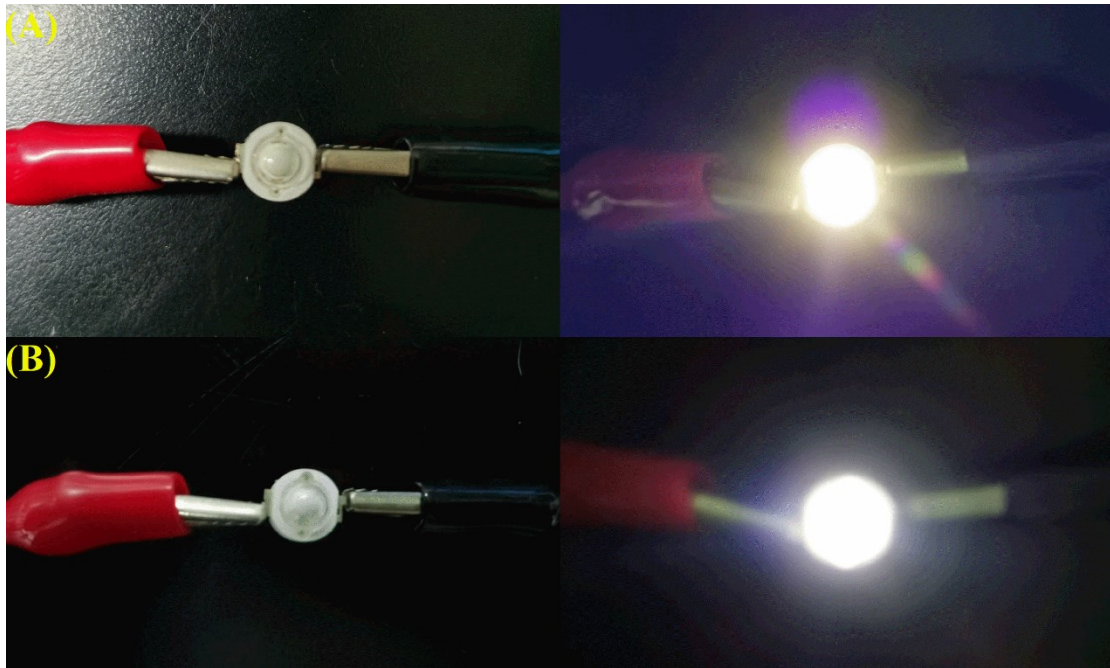

**Figure S9.** (A) The photograph of yellow LED with 375~380 nm UV-LED and LMBO:  $0.4\text{Tb}^{3+}$ ,  $0.005\text{Sm}^{3+}$  yellow phosphor combined; (B) The photograph of white LED with 375~380 nm UV-LED and LMBO:  $0.4\text{Tb}^{3+}$ ,  $0.005\text{Sm}^{3+}$  yellow phosphor and blue phosphor (BAM:  $\text{Eu}^{2+}$ ) combined.

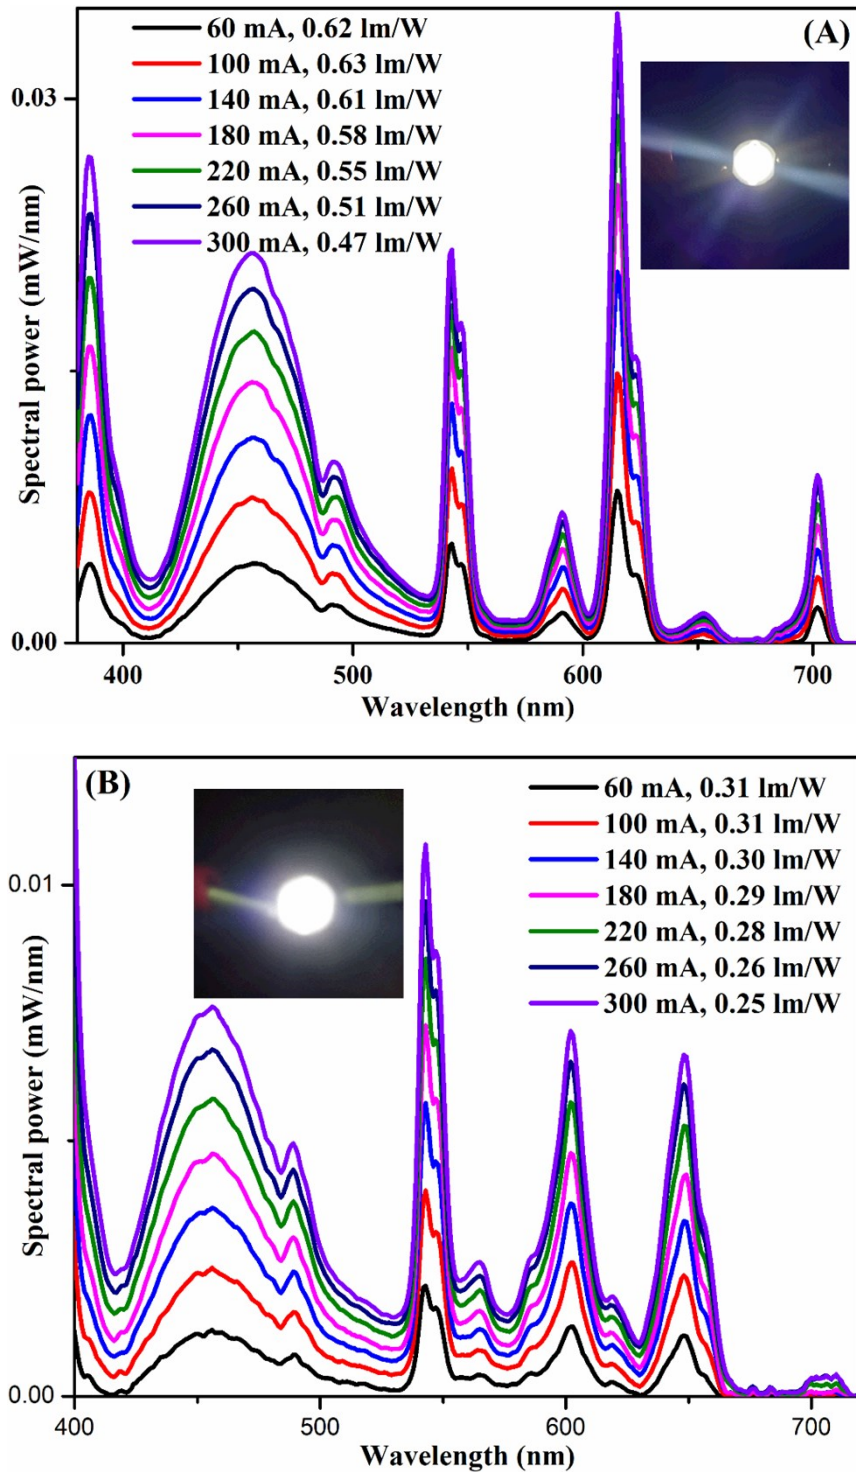

**Figure S10.** (A) The spectral power distribution of the white light LED combined with LMBO:  $0.4\text{Tb}^{3+}$ ,  $0.005\text{Eu}^{3+}$  yellow phosphor, BAM:  $\text{Eu}^{2+}$  blue phosphor and 375~380 nm UV-LED; (B) The spectral power distribution of the white light LED combined with LMBO:  $0.4\text{Tb}^{3+}$ ,  $0.005\text{Sm}^{3+}$  yellow phosphor, BAM:  $\text{Eu}^{2+}$  blue phosphor and 375~380 nm UV-LED.

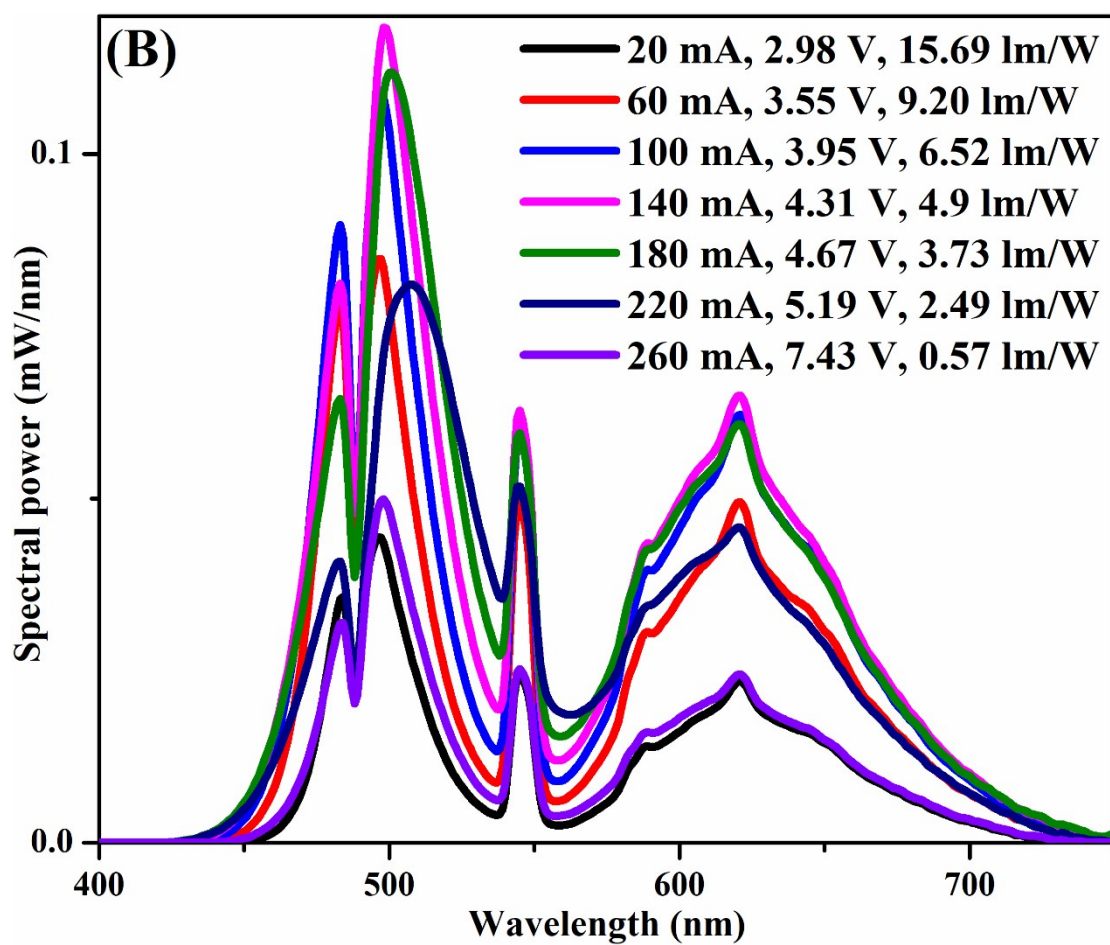

**Figure S11.** The spectral power distribution of the white LED combined with LMBO: Tb<sup>3+</sup> green phosphor, red phosphor (CaAlSiN<sub>3</sub>: Eu<sup>2+</sup>) and blue LED (Both voltage and current increase).



**Table S4.** The performance of white LED assembled by LMBO: 0.4Tb<sup>3+</sup>, 0.005Eu<sup>3+</sup> yellow phosphor, BAM: Eu<sup>2+</sup> blue phosphor and UV-LED.

| Voltage (V) | Current (mA) | CRI  | CCT (K) | luminescence efficiency (lm/W) |
|-------------|--------------|------|---------|--------------------------------|
| 3.14        | 60           | 44.4 | 25079   | 0.53                           |
| 3.19        | 100          | 48.5 | 23233   | 0.55                           |
| 3.23        | 140          | 49.5 | 26272   | 0.54                           |
| 3.26        | 180          | 49.8 | 30336   | 0.52                           |
| 3.3         | 220          | 50   | 38164   | 0.49                           |
| 3.33        | 260          | 50.2 | 54940   | 0.47                           |
| 3.36        | 300          | 50.2 | 94138   | 0.44                           |

**Table S5.** The performance of white LED assembled by LMBO: 0.4Tb<sup>3+</sup>, 0.005Sm<sup>3+</sup> yellow phosphor, BAM: Eu<sup>2+</sup> blue phosphor and UV-LED.

| Voltage (V) | Current (mA) | CRI  | CCT (K) | luminescence efficiency (lm/W) |
|-------------|--------------|------|---------|--------------------------------|
| 3.18        | 60           | 88.6 | 9438    | 0.31                           |
| 3.24        | 100          | 89.5 | 8960    | 0.31                           |
| 3.29        | 140          | 88.7 | 9411    | 0.3                            |
| 3.33        | 180          | 88.1 | 9773    | 0.29                           |
| 3.37        | 220          | 87.3 | 10114   | 0.28                           |
| 3.41        | 260          | 86.6 | 10469   | 0.26                           |
| 3.45        | 300          | 86.3 | 10933   | 0.25                           |

**Table S6.** The performance of white LED assembled by LMBO: 0.4Tb<sup>3+</sup> green phosphor, CaAlSiN<sub>3</sub>: Eu<sup>2+</sup> red phosphor and blue-LED.

| Voltage (V)           | Current (mA) | CRI  | CCT (K) | luminescence efficiency (lm/W) |
|-----------------------|--------------|------|---------|--------------------------------|
| constant voltage mode |              |      |         |                                |
| 5.65                  | 60           | 33.9 | 4676    | 0.23                           |
| 5.65                  | 140          | 34.5 | 4642    | 0.1                            |
| 5.65                  | 220          | 35.8 | 4571    | 0.06                           |
| 5.65                  | 300          | 34.6 | 4601    | 0.05                           |
| variable voltage mode |              |      |         |                                |
| 2.98                  | 20           | 46.4 | 4203    | 15.69                          |
| 3.55                  | 60           | 47.5 | 4186    | 9.2                            |
| 3.95                  | 100          | 50.5 | 4300    | 6.52                           |
| 4.31                  | 140          | 55.9 | 4491    | 4.9                            |
| 4.67                  | 180          | 63   | 4704    | 3.73                           |
| 5.19                  | 220          | 72   | 4905    | 2.49                           |
| 7.43                  | 260          | 52.1 | 4527    | 0.57                           |
